# Supplementary material
Source: publisher figshare collection journal article supplement (https://karger.figshare.com/articles/dataset/_/9896108)
Supplement: Supplementary file 1 [file 1]

**Supplementary Table 2** ICD-9 Codes Used for Readmission Reason Categorization

| Category                                      | ICD-9-CM code                                                                                                                                                                                                                                                                       |
|-----------------------------------------------|-------------------------------------------------------------------------------------------------------------------------------------------------------------------------------------------------------------------------------------------------------------------------------------|
| Surgery-related complication                  | 99859, 99749, 99889, 99811, 9986, 99813, 56962, 99812, 99832, 99831, 99851, 5643, 78062, 9972, 9982, 5642, 56969, 99739, 99779, 99799                                                                                                                                               |
| Infection                                     | 0389, 486, 00845, 56722, 03842, 03849, 5990, 0380, 5720, 99664, 99932, 99931, 0383, 7907, 99669, 0030, 0090, 03810, 03840, 0388, 11284, 53641, 56729, 5679, 5761, 6822, 99665, 99939                                                                                                |
| Gastrointestinal dysfunction                  | 5368, 5363, 5609, 5370, 5589, 56400, 5601, 53400, 53140, 53440, 53540, 53550, 53789, 5570, 5693, 5781, 5789, 5303, 53081, 53100, 53150, 53240, 53300, 53500, 53649, 5369, 5551, 5579, 56081, 56211, 5793, 78704, 7873, 78791                                                        |
| Failure to thrive                             | 27651, 7837, 2761, 4580, 2630, 2639, 2738, 45829, 4589                                                                                                                                                                                                                              |
| Progression of disease                        | 1579, 1570, 1572, 1578, 4578, 1571, 193, 1965, 1976, 2113                                                                                                                                                                                                                           |
| Venous thromboembolism/<br>Pulmonary embolism | 41519, 452, 45341, 41511, 44421, 4532, 45340, 4536                                                                                                                                                                                                                                  |
| Pain                                          | 78900, 33818, 78906, 78909, 78901, 78907, 56942, 78650                                                                                                                                                                                                                              |
| Diabetes-related                              | 25080, 25002, 25060, 24911, 25003, 25012, 25013, 25070, 25082, 2512, 2513, 79029, 9623                                                                                                                                                                                              |
| Cardiac-related                               | 42731, 42789, 41041, 41071, 4239, 4271, 42732, 42821, 42823, 42843, 43311, 43411, 44283                                                                                                                                                                                             |
| Pancreatico-biliary disorder                  | 5770, 5772, 5778, 57420, 5762                                                                                                                                                                                                                                                       |
| Anemia & Other Hematologic disorder           | 28860, 2800, 2851, 2859                                                                                                                                                                                                                                                             |
| Planned                                       | V5789, V554, V558, V5811, V5842                                                                                                                                                                                                                                                     |
| Other                                         | 5849, 78701, 78060, 78959, 5119, 5845, 5070, 5362, 5722, 2536, 44284, 51181, 82021, 9352, 96509, 99659, 25541, 28959, 2989, 38611, 4552, 4558, 49121, 49322, 5109, 5180, 51851, 51881, 5528, 570, 5715, 5734, 5738, 6238, 7802, 7804, 78079, 7820, 79092, 80102, 87364, 9331, 99674 |
