# Supplementary material
Source: publisher figshare collection journal article supplement (https://karger.figshare.com/articles/dataset/_/9896108)
Supplement: Supplementary file 2 [file 1]

**Supplementary Table 1** ICD-9 Codes for Postoperative Complication Identification

| Category                                                                     | ICD-9-CM code                                                                                                                                                                                                        |
|------------------------------------------------------------------------------|----------------------------------------------------------------------------------------------------------------------------------------------------------------------------------------------------------------------|
| Delayed gastric emptying                                                     | 536.3, 536.8, 536.9, 537.0, 564.2, 564.4, 997.4, 997.49                                                                                                                                                              |
| Wound complication (infection, seroma, dehiscence, evisceration, nonhealing) | 682.2, 682.8, 682.9, 686.8, 686.9, 998.5, 998.51, 998.59, 998.3, 998.30, 998.31                                                                                                                                      |
| Pancreatic fistula/ fistula                                                  | 998.6                                                                                                                                                                                                                |
| Intra-abdominal abscess/ infection                                           | 567.0, 567.2, 567.22, 567.29, 567.38, 567.39, 567.8, 567.89, 567.9, 569.5                                                                                                                                            |
| Hemorrhage/ hematoma/ seroma                                                 | 998.1, 998.11, 998.12, 998.13, 999.2                                                                                                                                                                                 |
| Pneumonia/ aspiration pneumonitis                                            | 112.4, 480.8, 480.9, 481, 482, 482.1, 482.2, 482.3, 482.30, 482.31, 482.32, 482.39, 482.4, 482.40, 482.41, 482.42, 482.49, 482.8, 482.81, 482.82, 482.83, 482.89, 483, 483.8, 484.8, 485, 486, 513.0, 997.31, 997.32 |
| Bacteremia/ septicemia/ sepsis (including septic shock)/ shock               | 038.0, 038.10, 038.11, 038.12, 038.19, 038.2, 038.40, 038.41, 038.42, 038.43, 038.44, 038.49, 038.8, 038.9, 790.7, 995.91, 995.92, 998.02, 785.52, 995.90, 998.0, 995.4, 999.4, 785.50, 785.51, 785.59               |
| Other                                                                        | 998.9, 998.89, 998.8, 998.4, 997.99, 997.9                                                                                                                                                                           |
