# Supplementary material
Source: publisher figshare collection journal article supplement (https://karger.figshare.com/articles/dataset/_/9896108)

**Supplementary Figure 1** Flow chart for sample selection

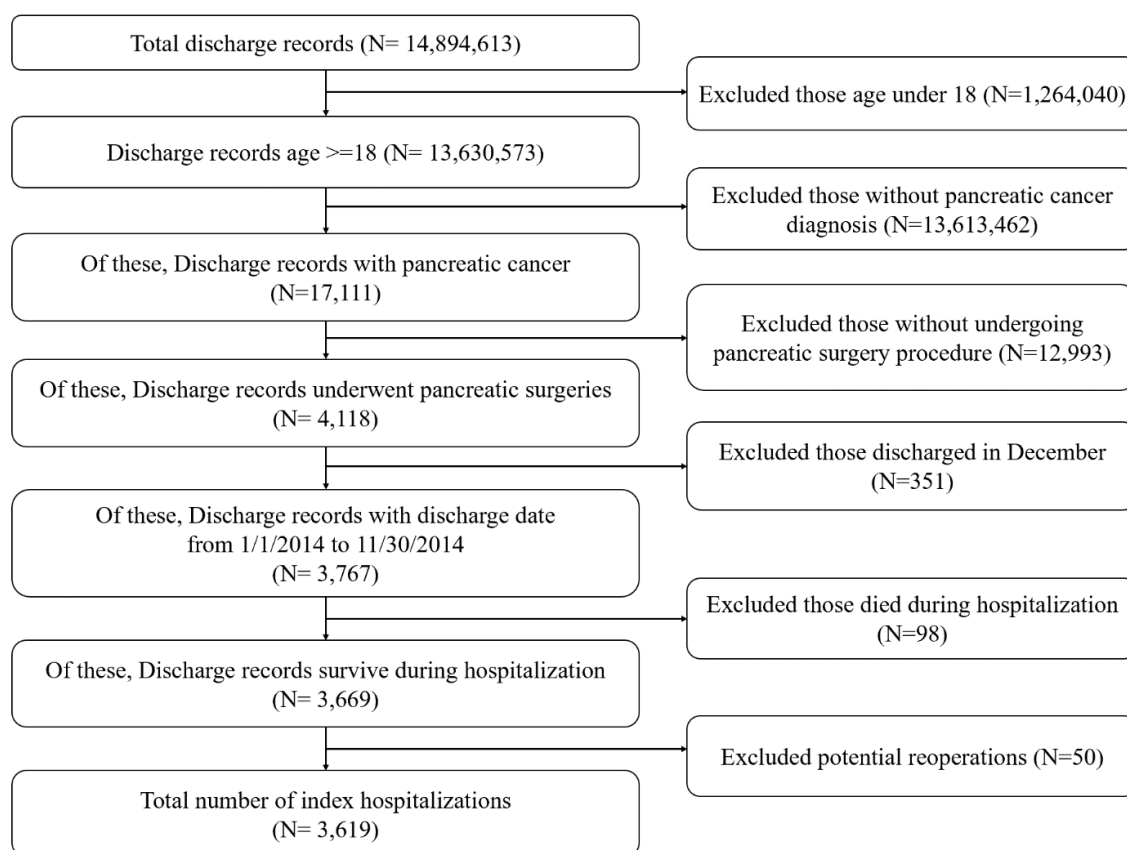

Supplement: Supplementary file 3 [file 1]
